# Supplementary material for: Fe3O4@SiO2@SBA-3@CPTMS@Arg-Cu: preparation, characterization, and catalytic performance in the conversion of nitriles to amides and the synthesis of 5-substituted 1H-tetrazoles
Source: Royal Society of Chemistry journal article supplement (doi:10.1039/d3na00318c), 2024-01-01

## **Fe<sub>3</sub>O<sub>4</sub>@SiO<sub>2</sub>@SBA-3@CPTMS@Arg-Cu: preparation, characterization, and catalytic performance for the conversion of nitriles to amides and synthesis of 5-substituted 1H-tetrazoles**

Zahra Heidarneshad,<sup>a</sup> Arash Ghorbani-Choghamarani,<sup>b,\*</sup> Zahra Taherinia<sup>a</sup>

### **Selected Spectral Data**

**2-Chlorobenzamide** (Table 4, entry 1): <sup>1</sup>H NMR (400 MHz, DMSO) δ 7.98(s, 2H), 7.48-7.39(m, 4H). <sup>13</sup>C NMR (100 MHz, DMSO-d<sub>6</sub>, ppm) δ 168.6, 162.2, 137.4, 130.9, 130.0, 129.0, 127.4.

**4-Chlorobenzamide** (Table 4, entry 2): <sup>1</sup>H NMR (400 MHz, DMSO) δ 8.0 (s, 2H), 7.89 (d, *J* = 8 Hz, 2H), 7.87 (d, *J* = 8 Hz, 2H). <sup>13</sup>C NMR (100 MHz, DMSO-d<sub>6</sub>, ppm) δ 167.2, 162.5, 136.4, 133.4, 129.7, 128.6.

**4-Bromobenzamide** (Table 4, entry 3): <sup>1</sup>H NMR (400 MHz, DMSO) δ 8.0 (s, 2H), 7.82 (d, *J* = 6 Hz, 2H), 7.65 (d, *J* = 8 Hz, 2H). <sup>13</sup>C NMR (100 MHz, DMSO-d<sub>6</sub>, ppm) δ 166.9, 133.4, 131.2, 129.6, 124.9.

**4-Nitrobenzamide** (Table 4, entry 4): <sup>1</sup>H NMR (400 MHz, DMSO) δ 8.3 (d, *J* = 12 Hz, 2H), 8.0 (d, *J* = 8 Hz, 2H), 7.7 (s, 1H).

**Benzamide** (Table 4, entry 8): <sup>1</sup>H NMR (400 MHz, DMSO) δ 7.98(s, 2H), 7.82(d, *J* = 6 Hz, 2H), 7.50-7.45(m, 3H). <sup>13</sup>C NMR (100 MHz, DMSO-d<sub>6</sub>, ppm) δ 168.3, 162.2, 134.6, 131.6, 128.6, 127.8.

**5-phenyl-1H-tetrazole** (Table 6, entry 1): <sup>1</sup>H NMR (400 MHz, DMSO) δ 8.03(d, *J* = 6 Hz, 3H), 7.57(d, *J* = 6 Hz, 2H). <sup>13</sup>C NMR (100 MHz, DMSO-d<sub>6</sub>, ppm) δ 162.2, 155.1, 131.6, 129.7, 127.3, 124.5.

**5-(4-Chlorophenyl)-1H-tetrazole** (Table 6, entry 2): <sup>1</sup>H NMR (400 MHz, DMSO) δ 8.05 (d, *J* = 8.4 Hz, 2H), 7.69 (d, *J* = 8.4 Hz, 2H). <sup>13</sup>C NMR (100 MHz, DMSO-d<sub>6</sub>, ppm) δ 162.1, 155.3, 148.5, 133.2, 131.4, 126.4, 125.8, 121.7.

**5-(4-Bromophenyl)-1H-tetrazole** (Table 6, entry 3): <sup>1</sup>H NMR (400 MHz, DMSO) δ 7.95(d, *J* = 6, 2H), 7.78(d, *J* = 6, 2H). <sup>13</sup>C NMR (100 MHz, DMSO-d<sub>6</sub>, ppm) δ 162.2, 155.3, 132.8, 129.2, 125.0, 123.9.

**5-(4-nitrophenyl)-1H-tetrazole** (Table 6, entry 4): <sup>1</sup>H NMR (400 MHz, DMSO) δ 8.35(d, *J* = 6 Hz, 2H), 8.22(d, *J* = 6 Hz, 2H). <sup>13</sup>C NMR (100 MHz, DMSO-d<sub>6</sub>, ppm) δ 162.2, 155.8, 148.9, 130.9, 128.4, 124.8.

**1-(4-(1H-tetrazol-5-yl)phenyl)ethan-1-one**(Table 6, entry 5):  $^{13}\text{C}$  NMR (100 MHz, DMSO- $d_6$ , ppm)  $\delta$  197.3, 138.5, 129.1, 128.4, 127.1, 26.8.

**4-(1H-tetrazol-5-yl)benzotrile** (Table 6, entry 6):  $^1\text{H}$  NMR (400 MHz, DMSO)  $\delta$  8.20(d,  $J = 12$  Hz, 2H), 8.08(d,  $J = 12$  Hz, 2H).  $^{13}\text{C}$  NMR (100 MHz, DMSO- $d_6$ , ppm)  $\delta$  166.7, 162.2, 155.9, 133.7, 129.1, 127.9, 118.5, 113.7.

**5-(3-nitrophenyl)-1H-tetrazole** (Table 6, entry 7):  $\delta$  8.74(s, 1H), 8.41(q,  $J = 8$ , 2H), 7.86(t,  $J = 8$ , 1H).  $^{13}\text{C}$  NMR (100 MHz, DMSO- $d_6$ , ppm)  $\delta$  162.1, 155.3, 148.5, 133.2, 131.4, 126.4, 125.8, 121.7.

**2-(1H-tetrazol-5-yl)benzotrile** (Table 6, entry 8):  $^1\text{H}$  NMR (400 MHz, DMSO)  $\delta$  8.06(s, 2H), 7.92(t,  $J=6$ , 1H), 7.77(t,  $J=6$ , 1H).  $^{13}\text{C}$  NMR (100 MHz, DMSO- $d_6$ , ppm)  $\delta$  162.2, 135.3, 134.1, 131.7, 130.0, 127.8, 117.6, 110.5.

**2-(1H-Tetrazol-5-yl) phenol** (Table 6, entry 10):  $^1\text{H}$  NMR (400 MHz, DMSO)  $\delta$  8.00-7.98 (m, 1H), 7.44 (d,  $J=8$ , 1H), 7.40 (t,  $J=4$ , 1H), 7.08-6.97 (m, 1H).  $^{13}\text{C}$  NMR (100 MHz, DMSO- $d_6$ , ppm)  $\delta$  162.5, 155.7, 152.0, 133.0, 129.4, 120.0, 116.7, 110.8.

**5-benzyl-1H-tetrazole** (Table 6, entry 11):  $^1\text{H}$  NMR (400 MHz, DMSO)  $\delta$  8.04(s, 1H), 7.31(m, 5H), 4.28(s, 2H).  $^{13}\text{C}$  NMR (100 MHz, DMSO- $d_6$ , ppm)  $\delta$  155.7, 136.2, 131.6, 129.7, 129.1, 129.0, 127.3, 29.2.

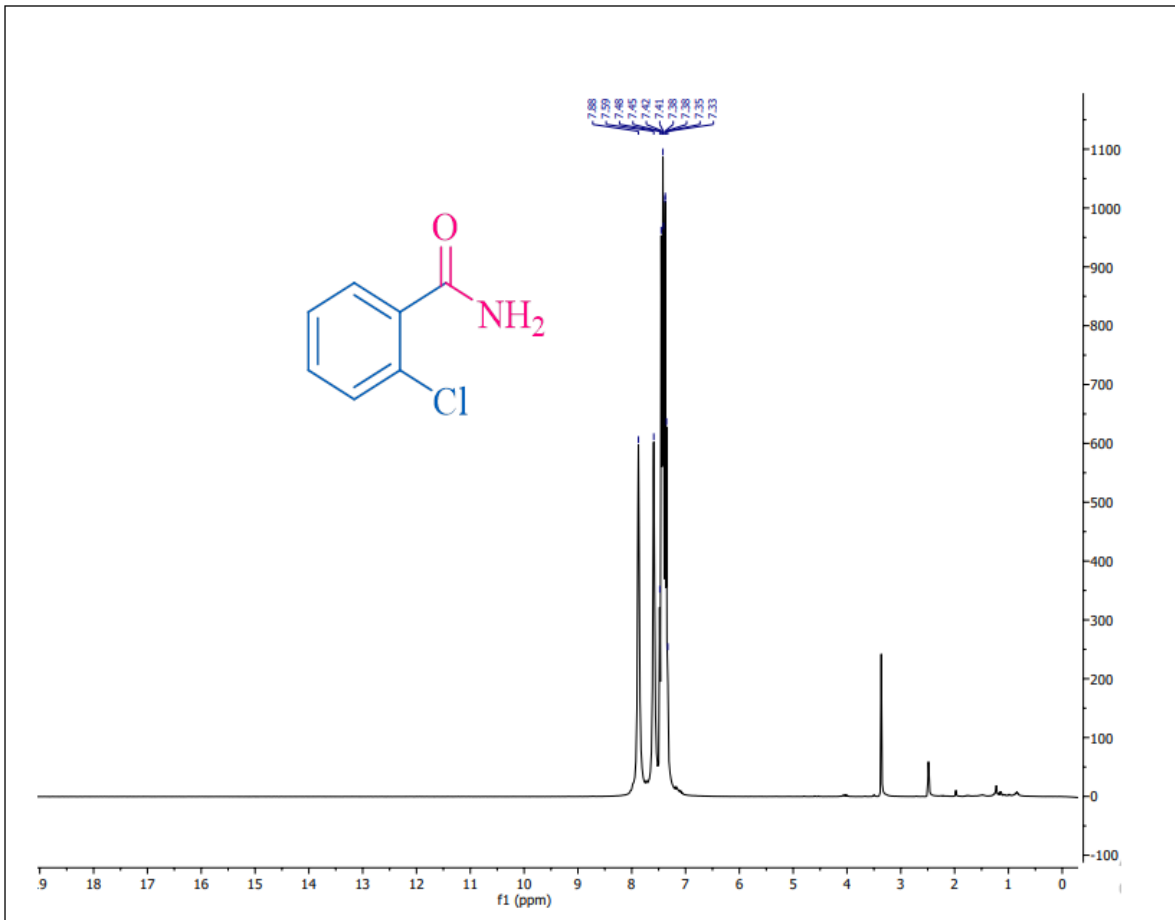

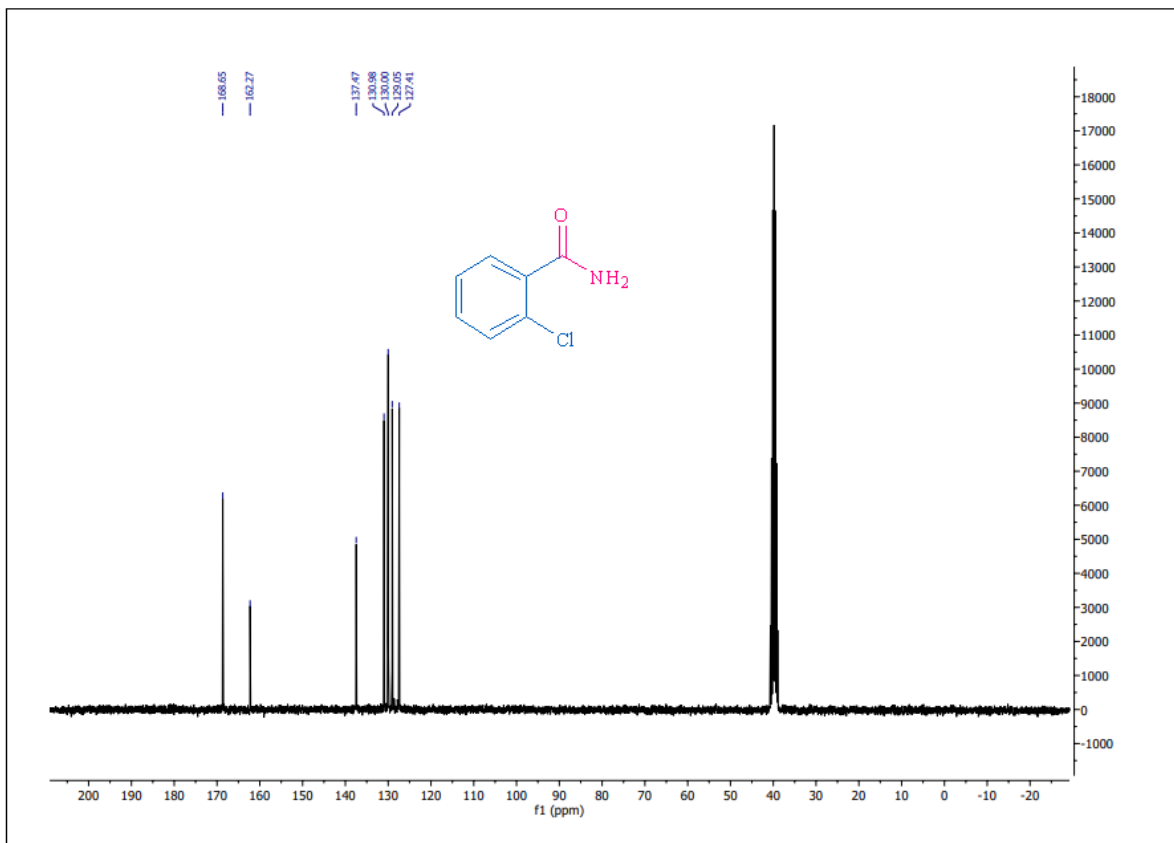

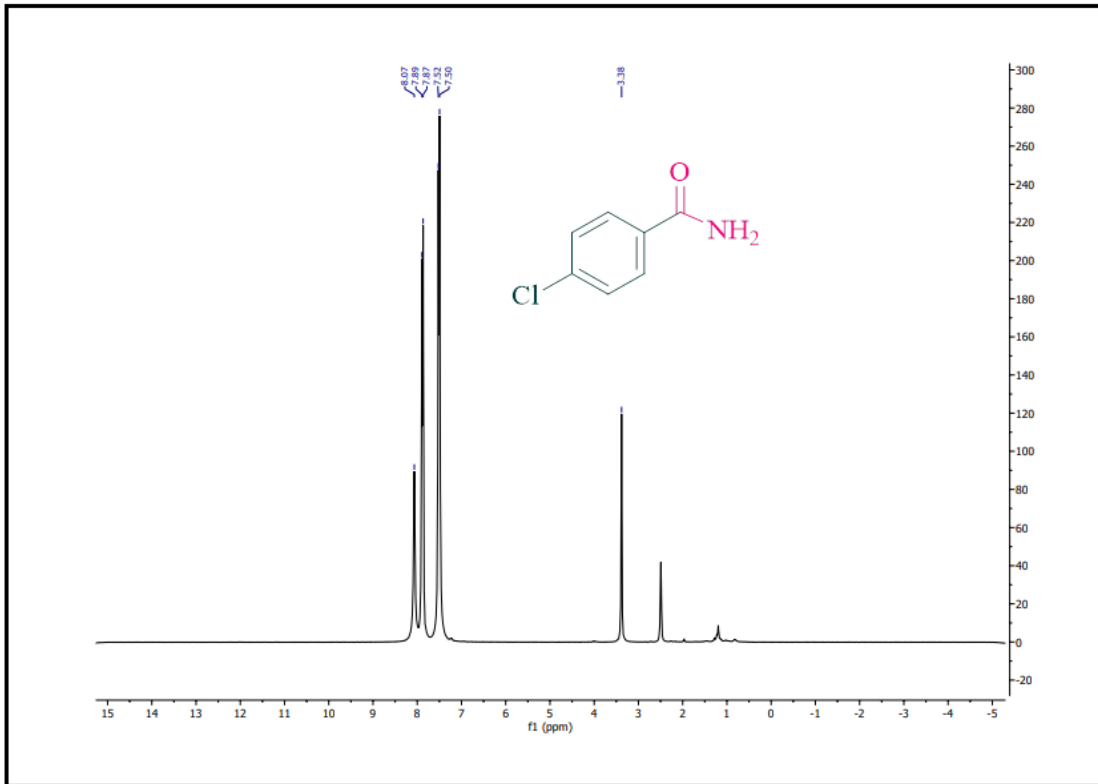

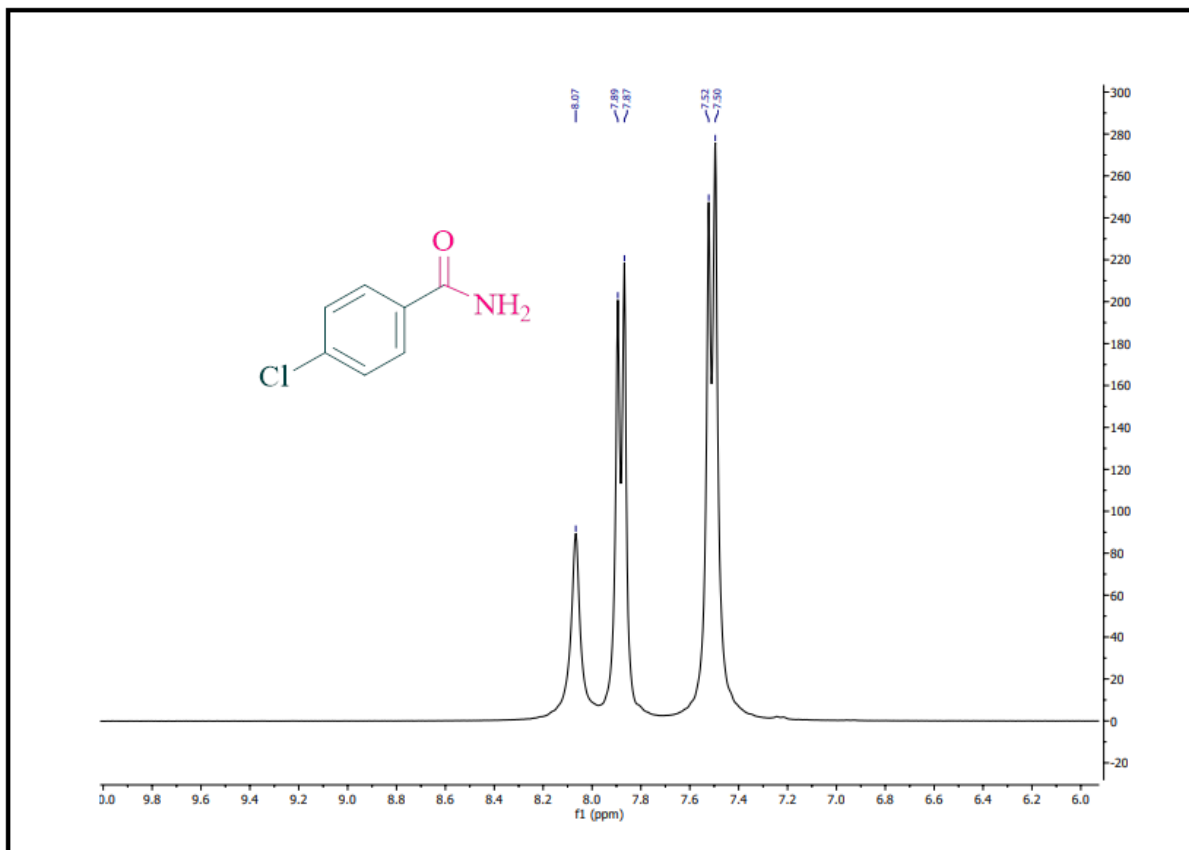

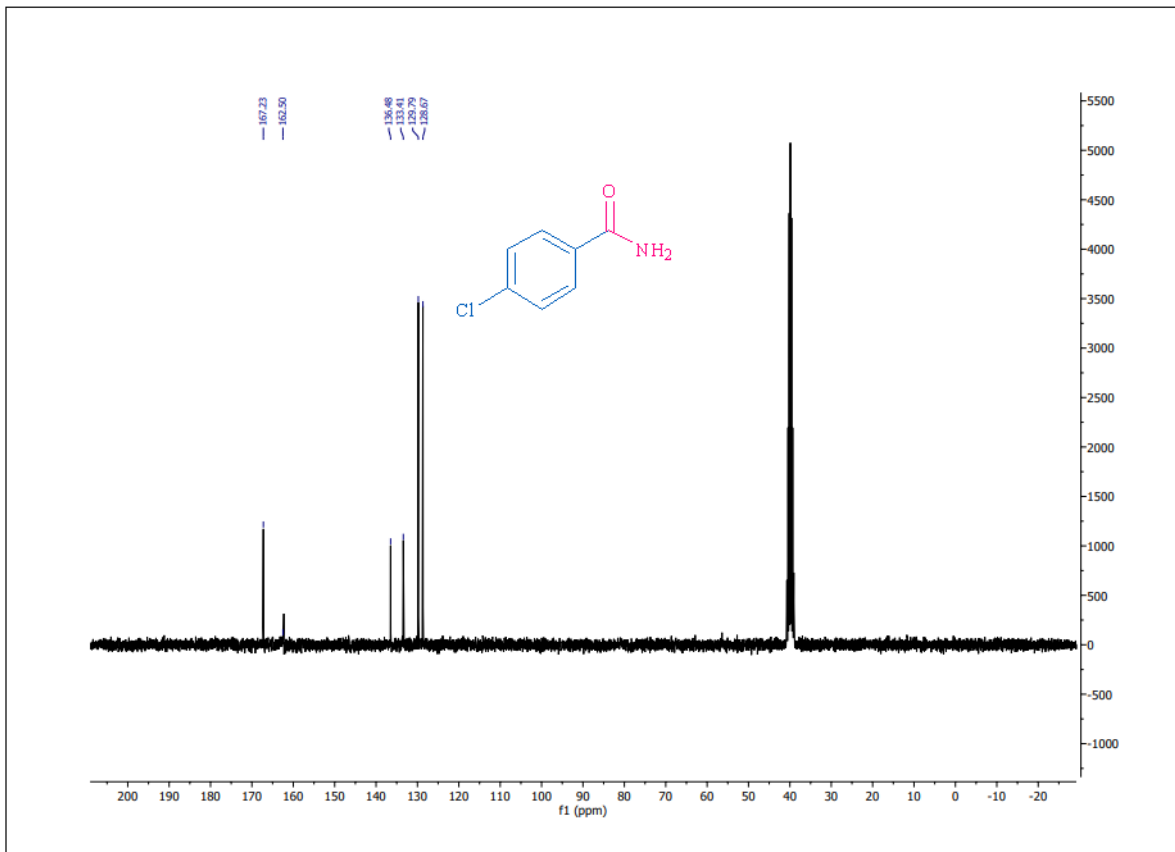

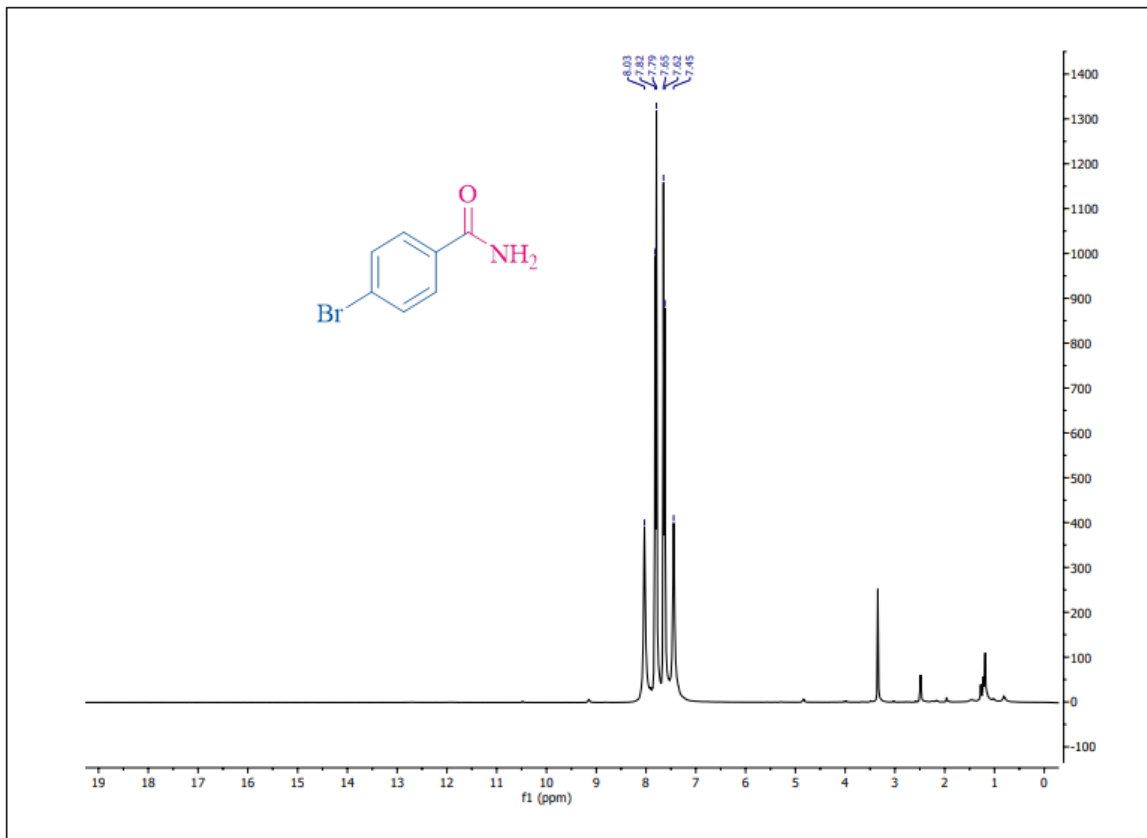



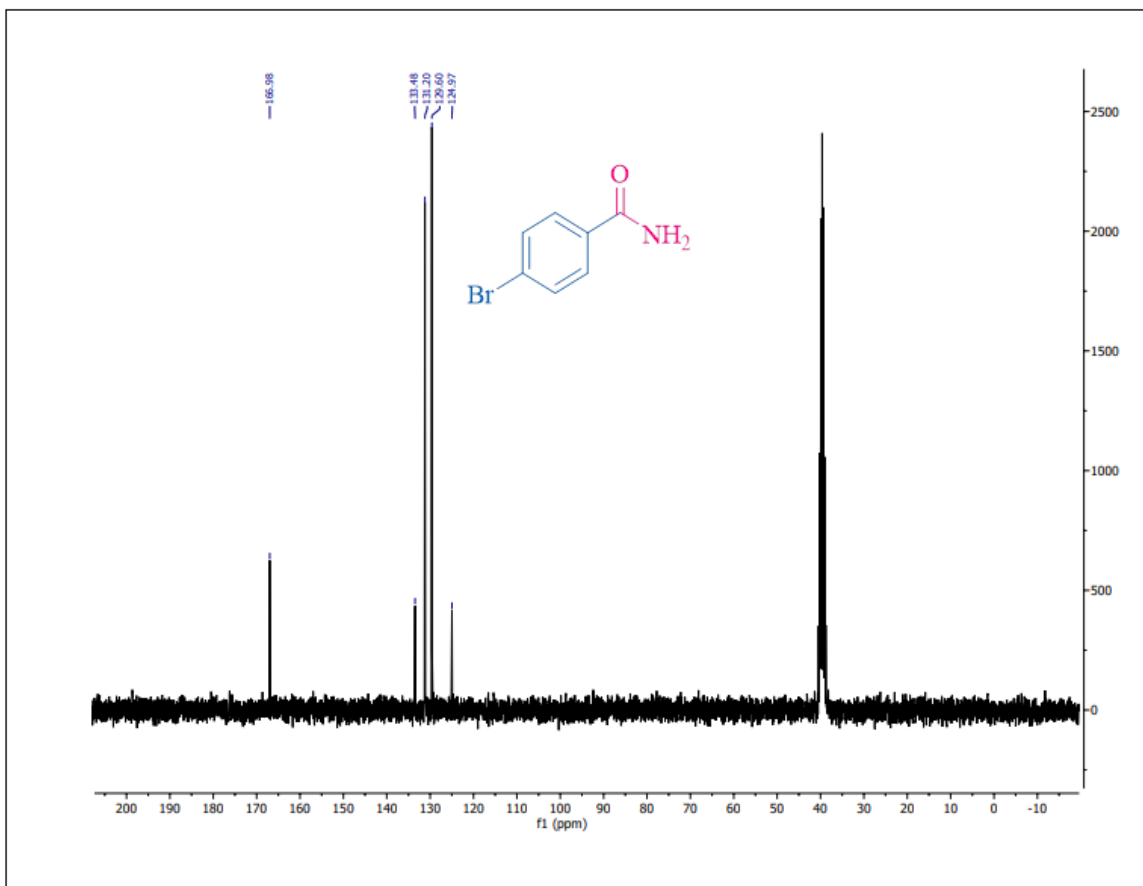

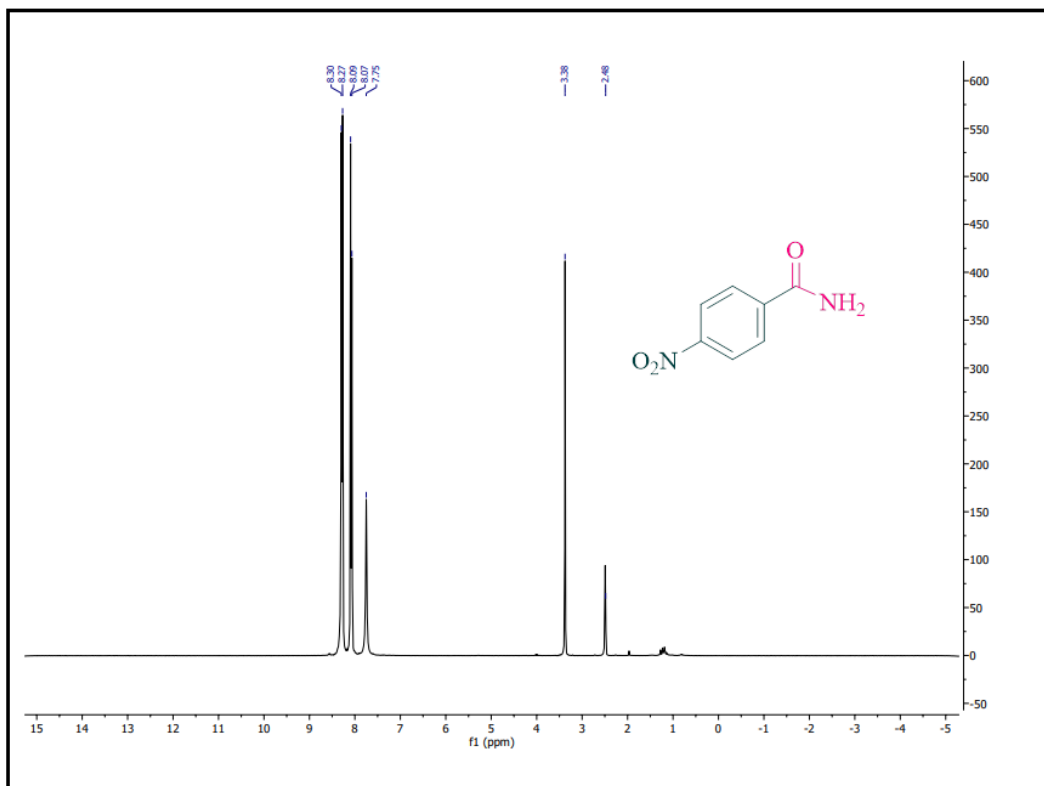

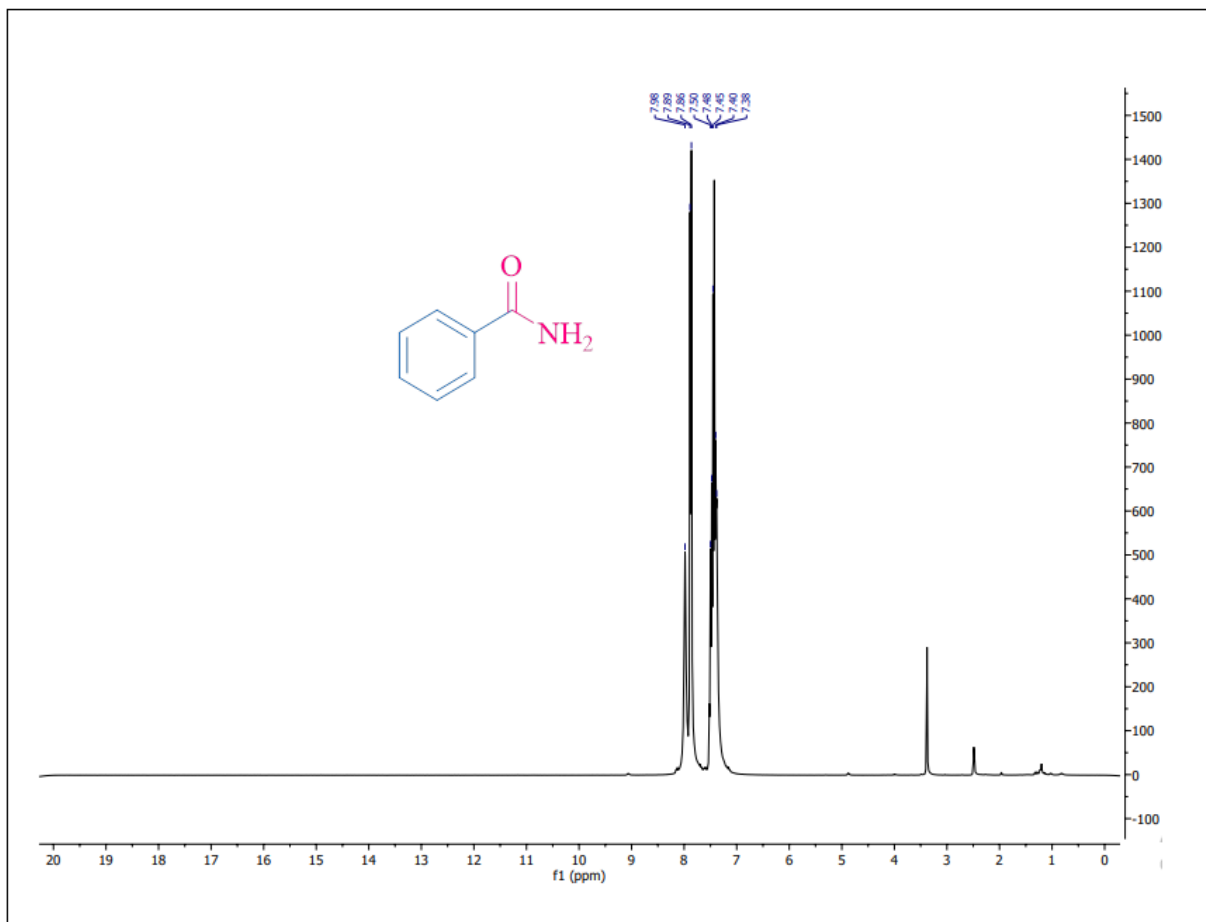

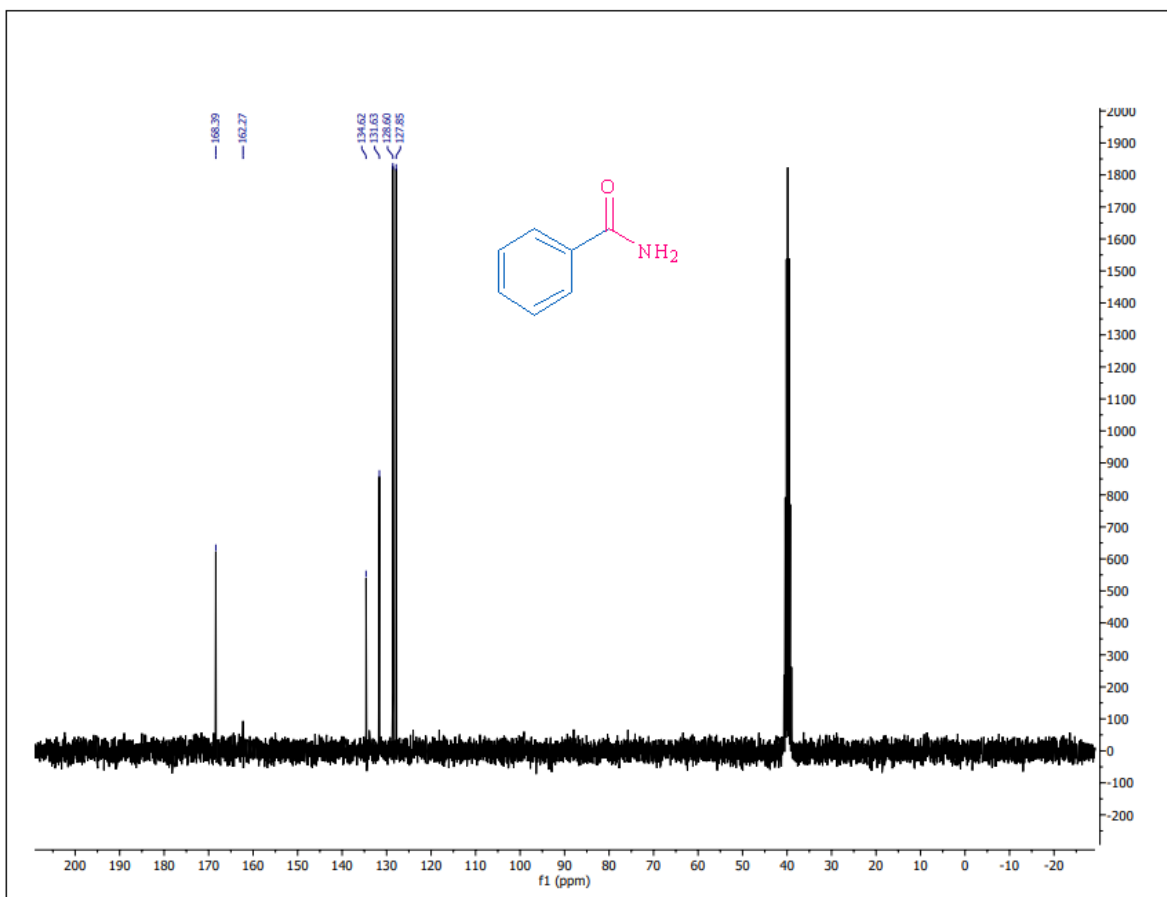

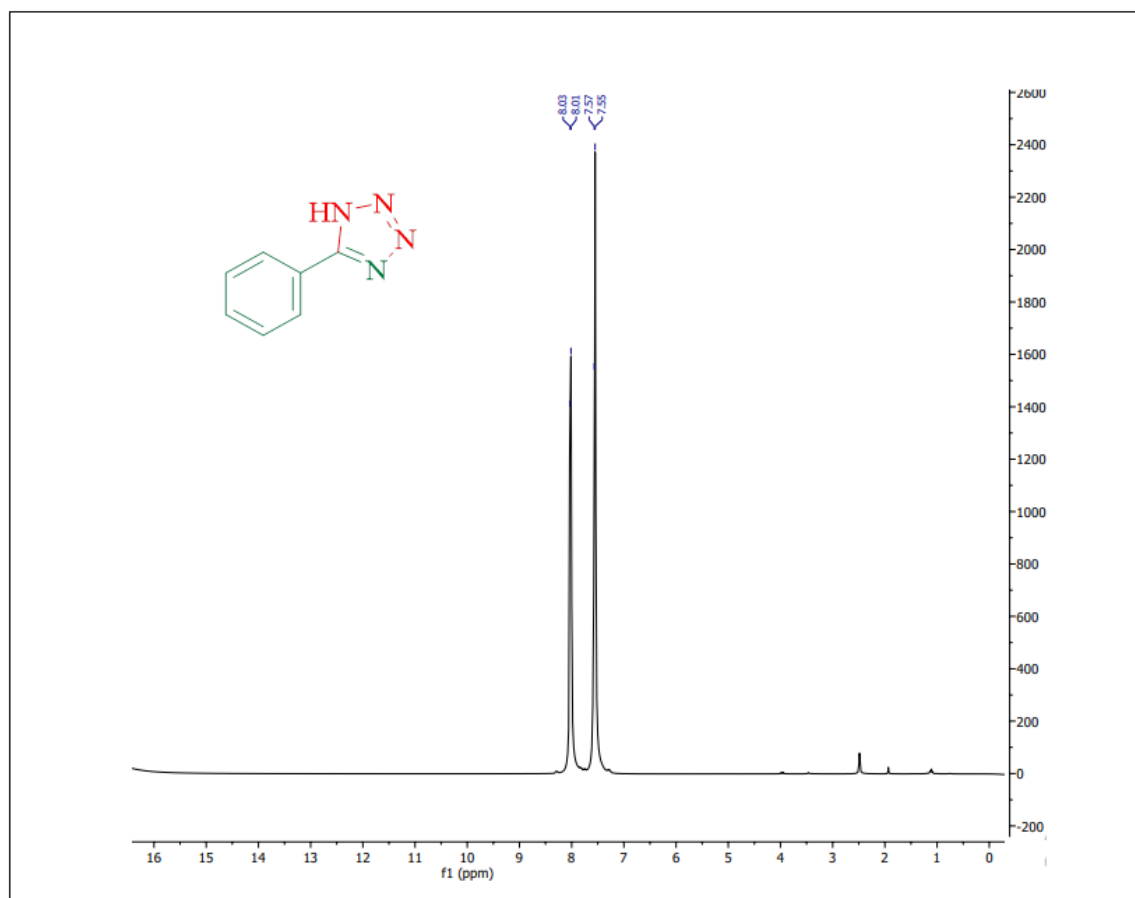

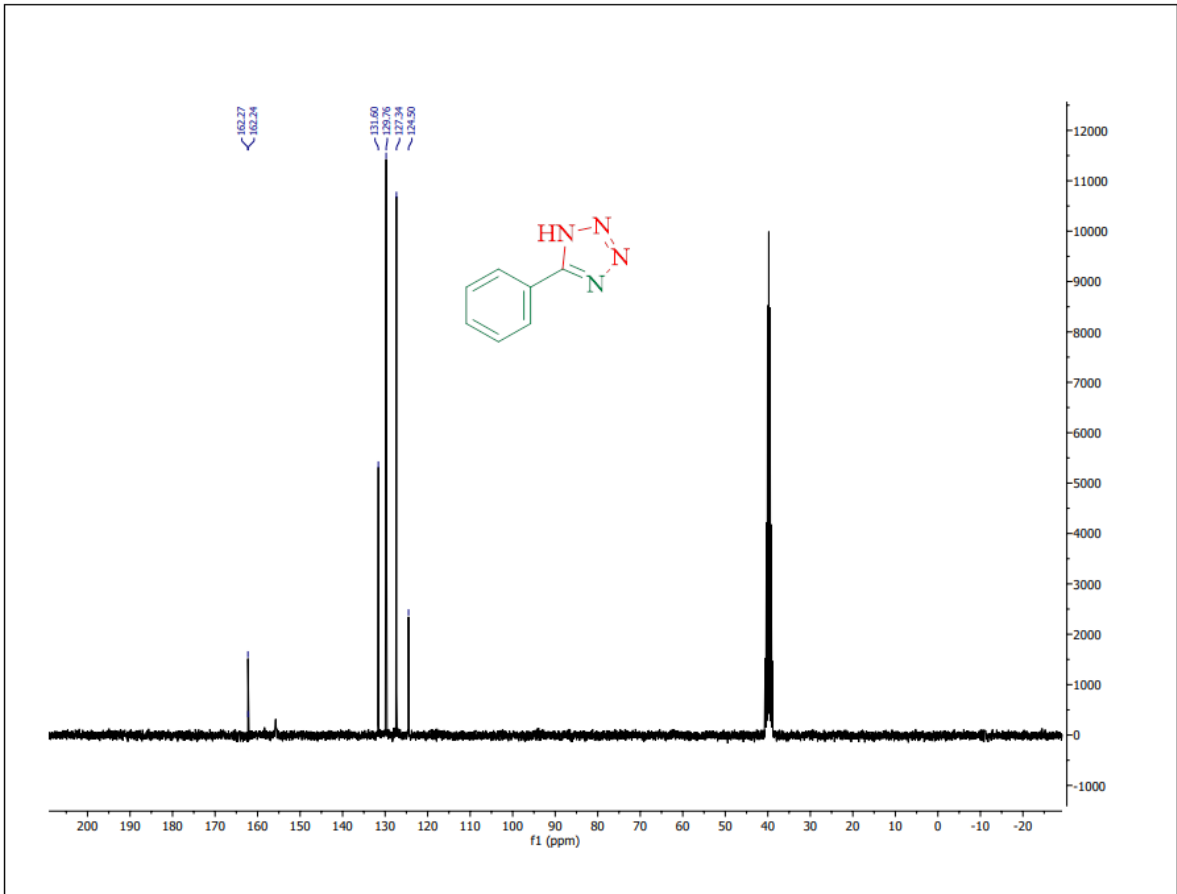

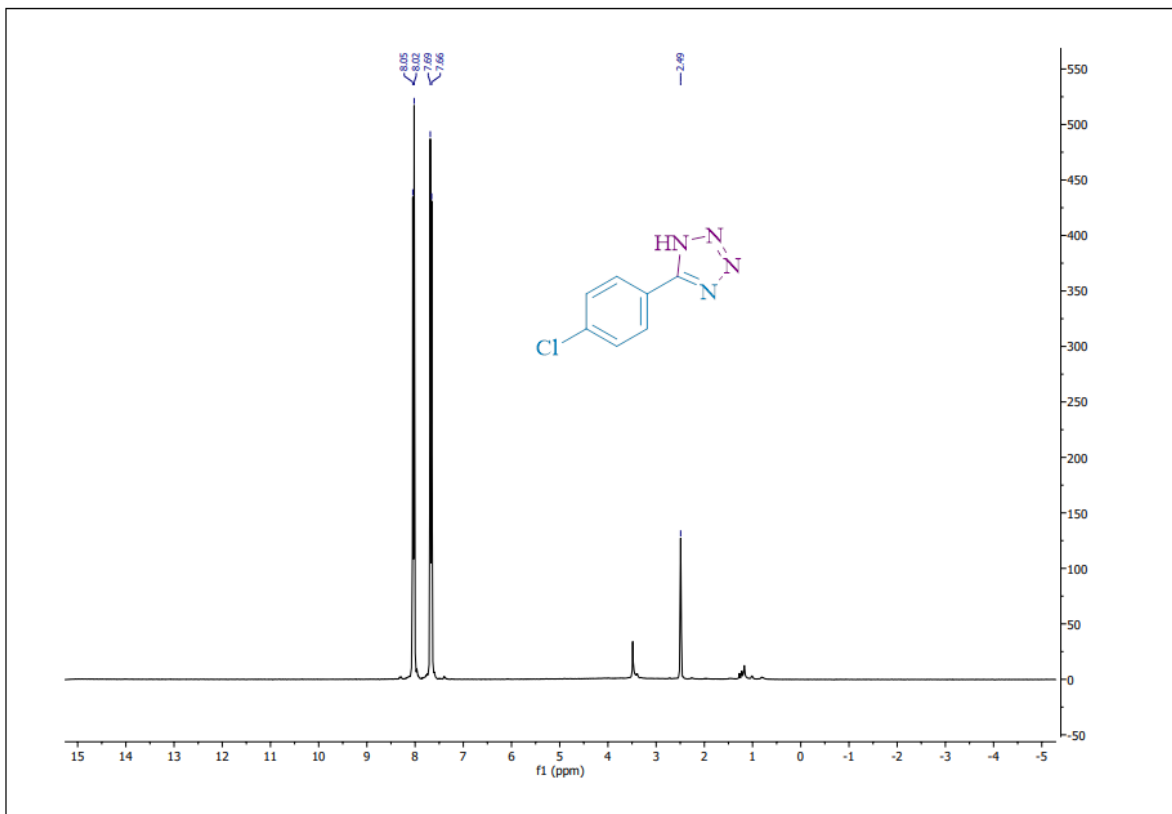

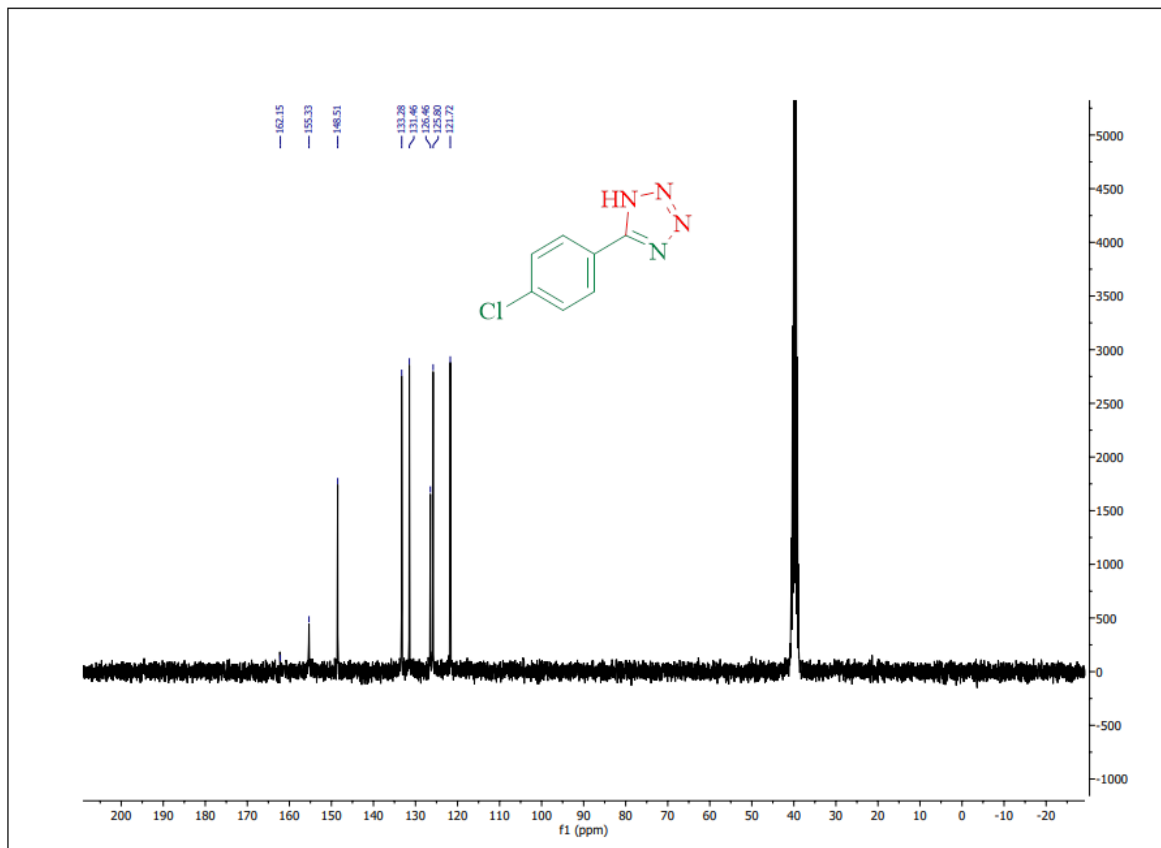



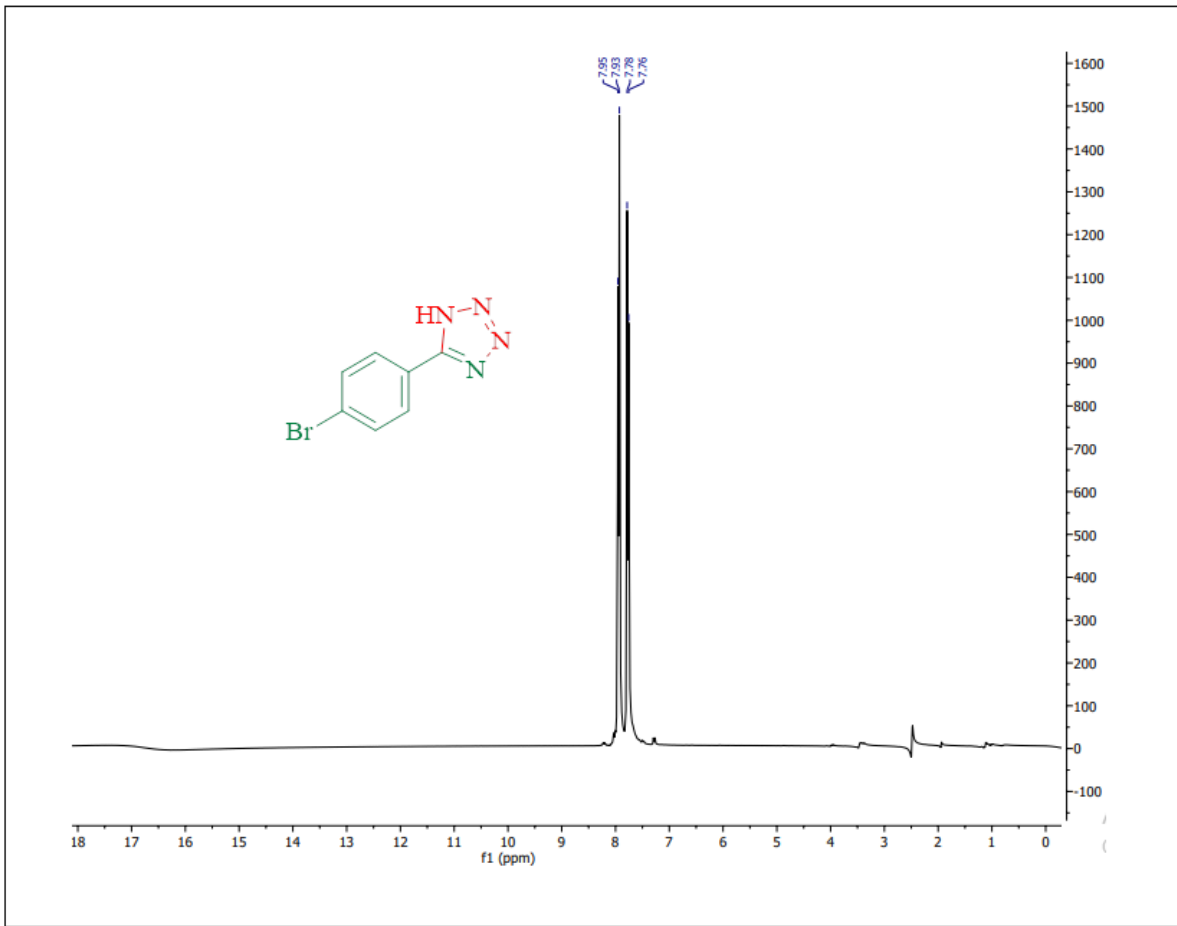

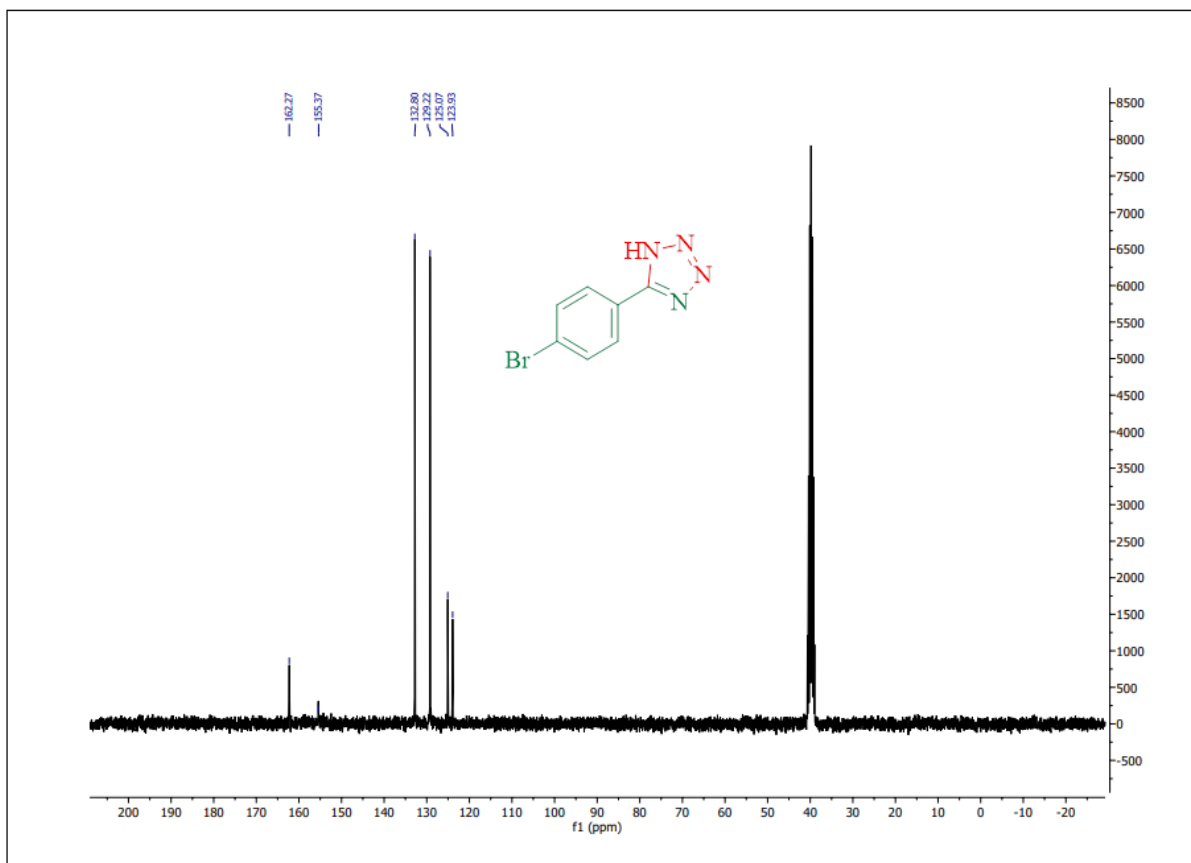

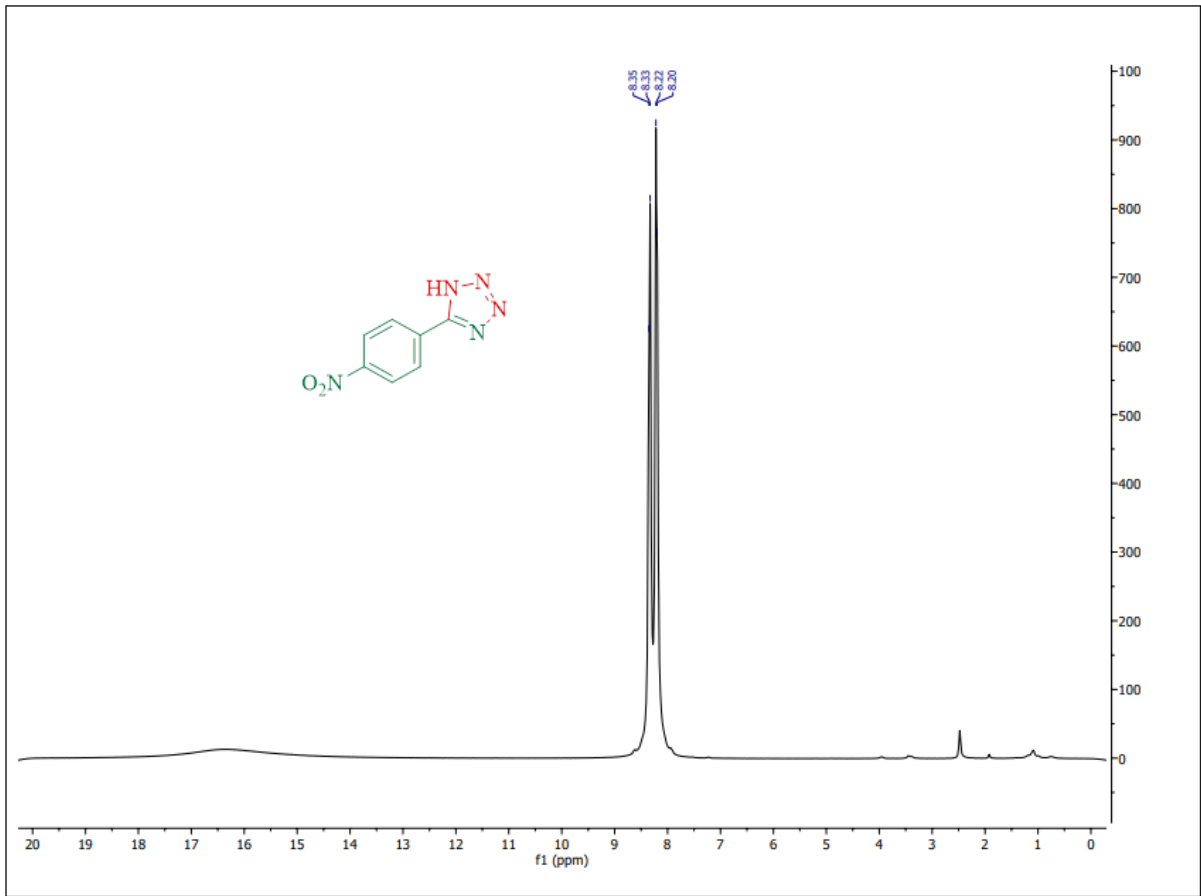

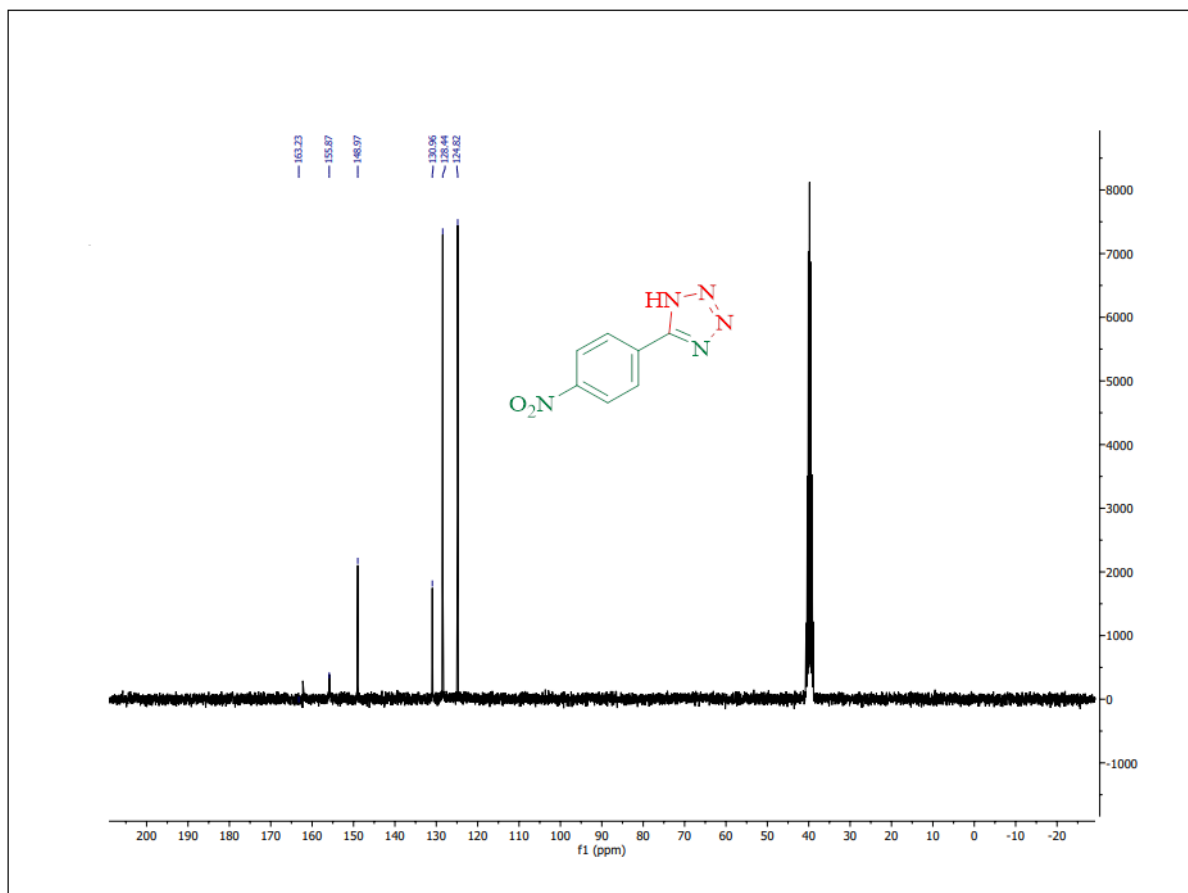

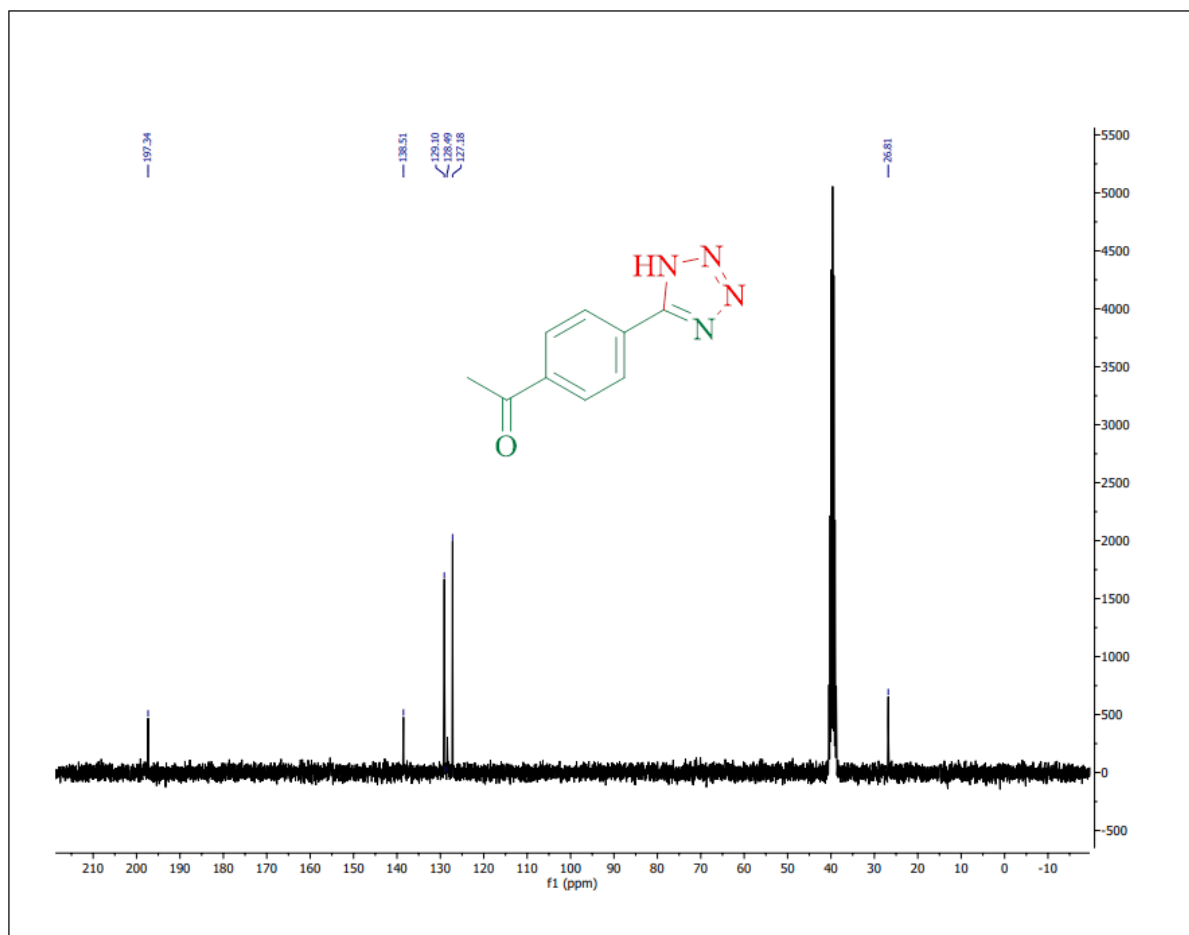

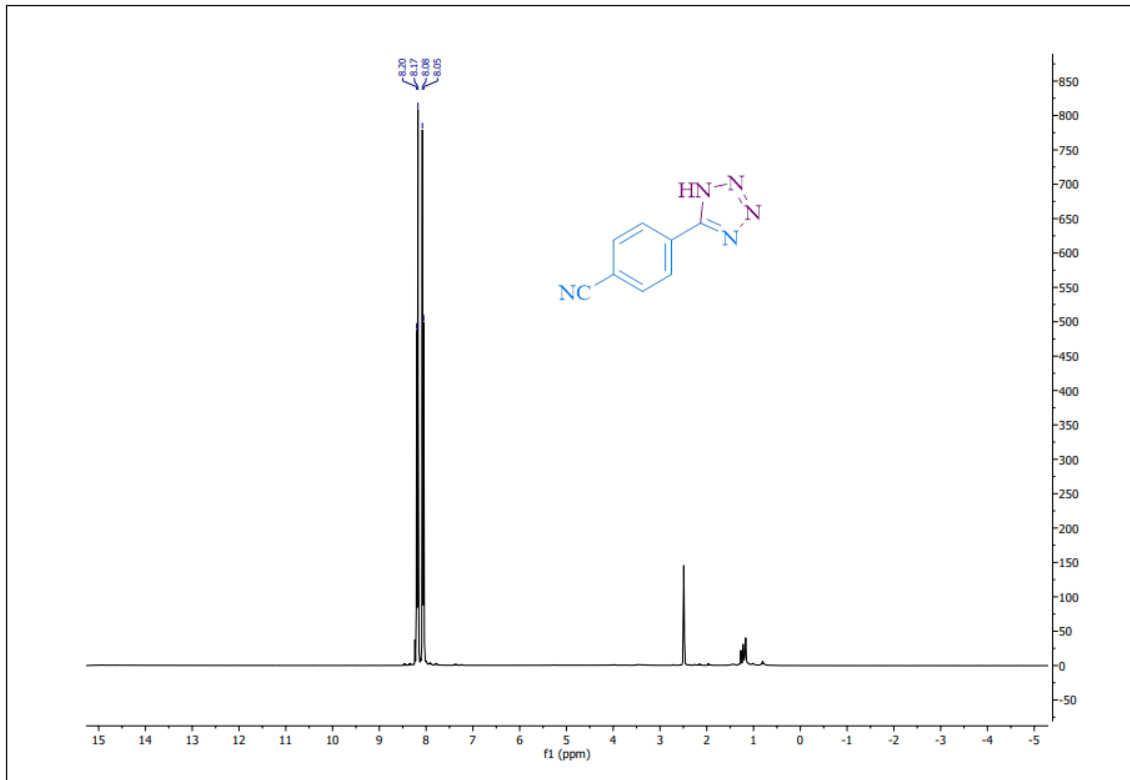

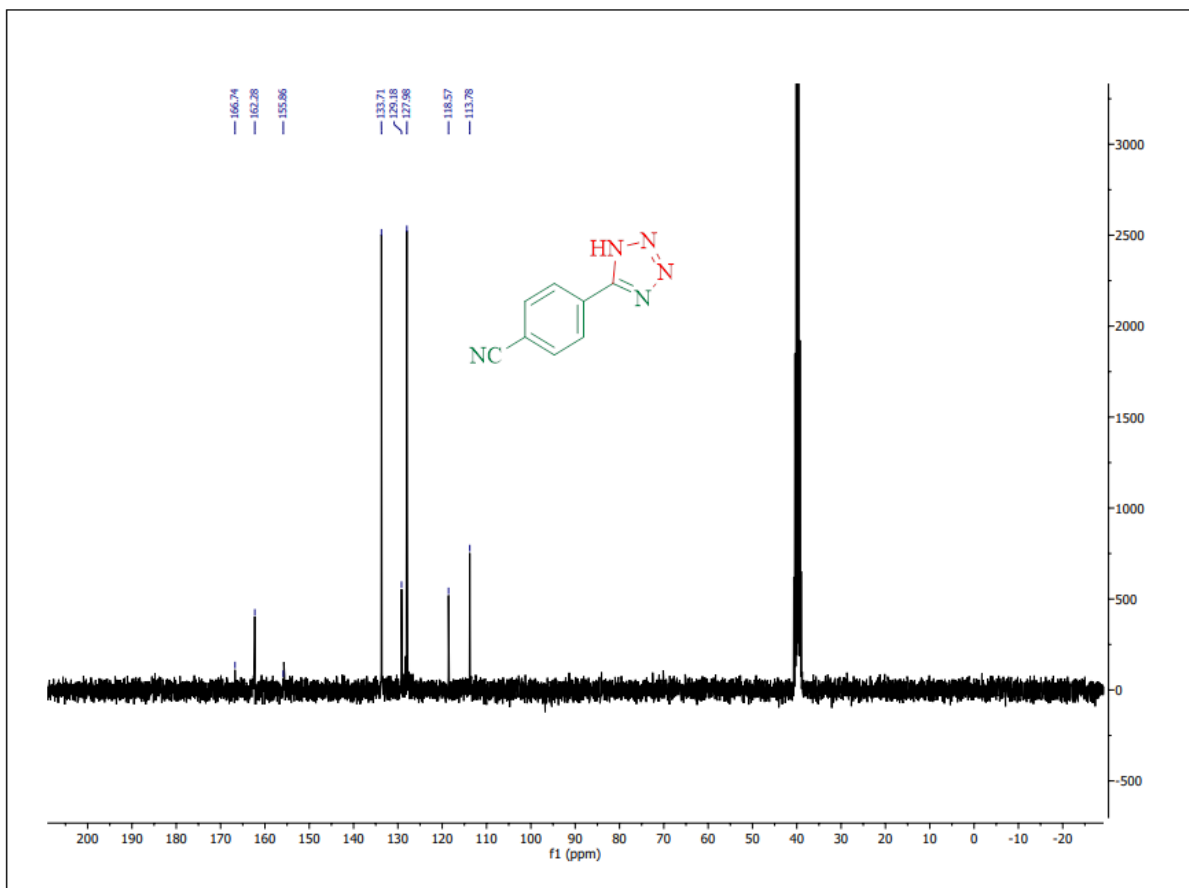

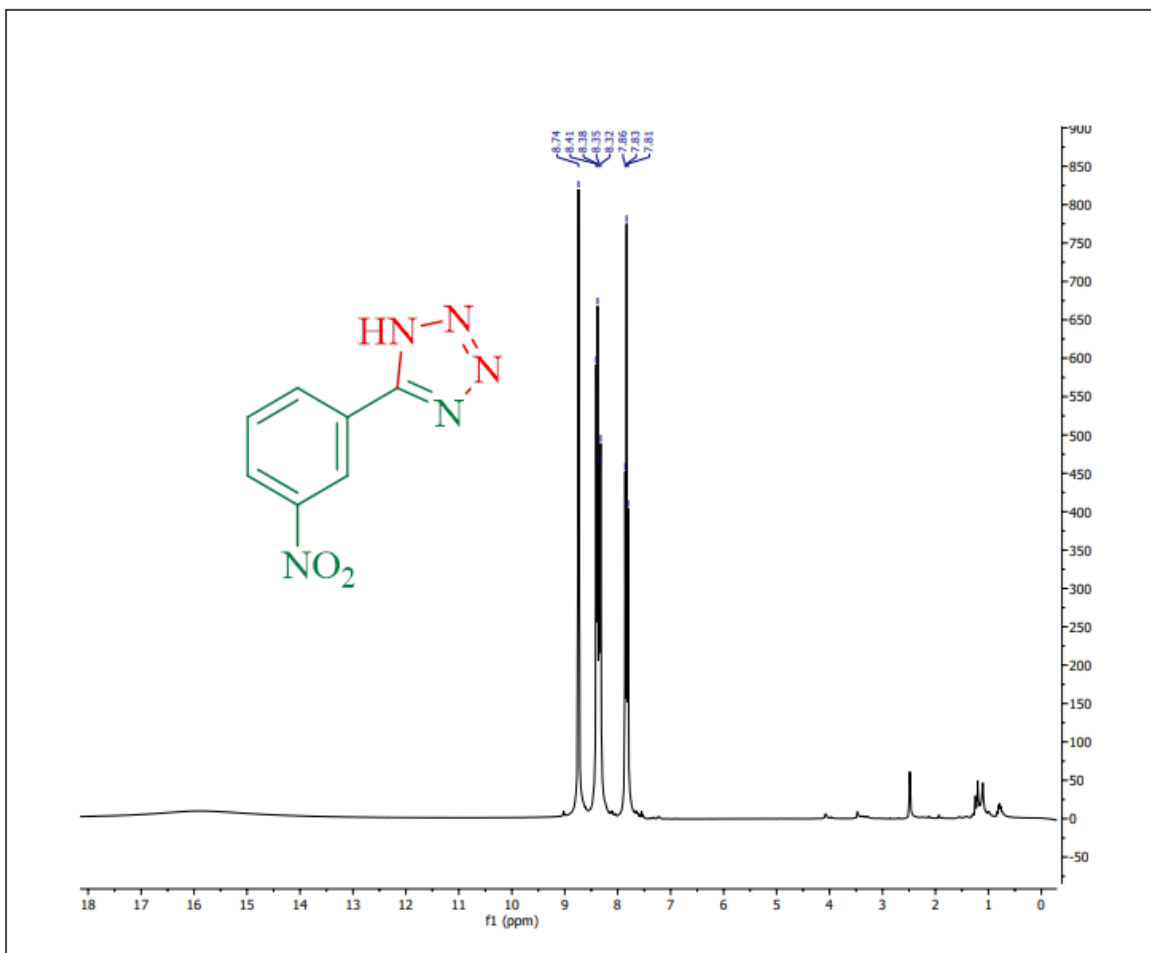



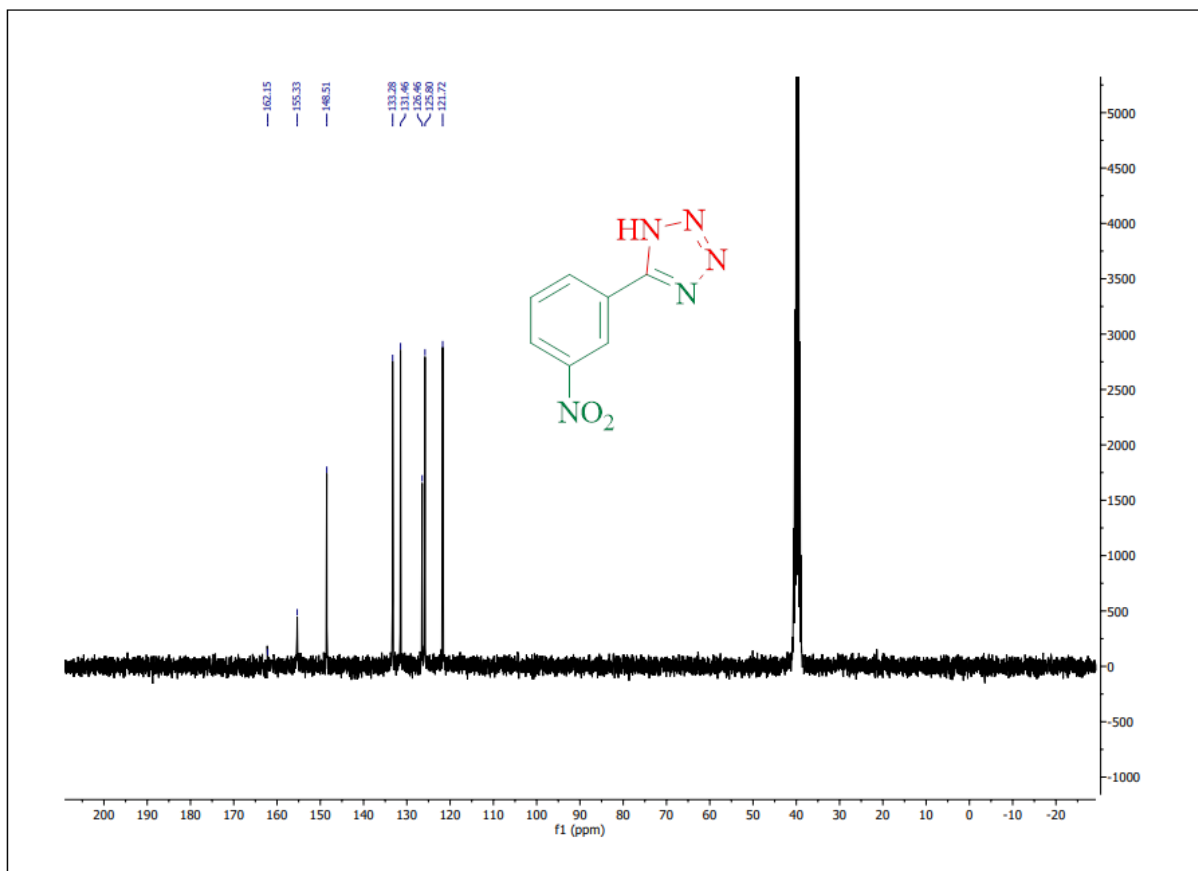

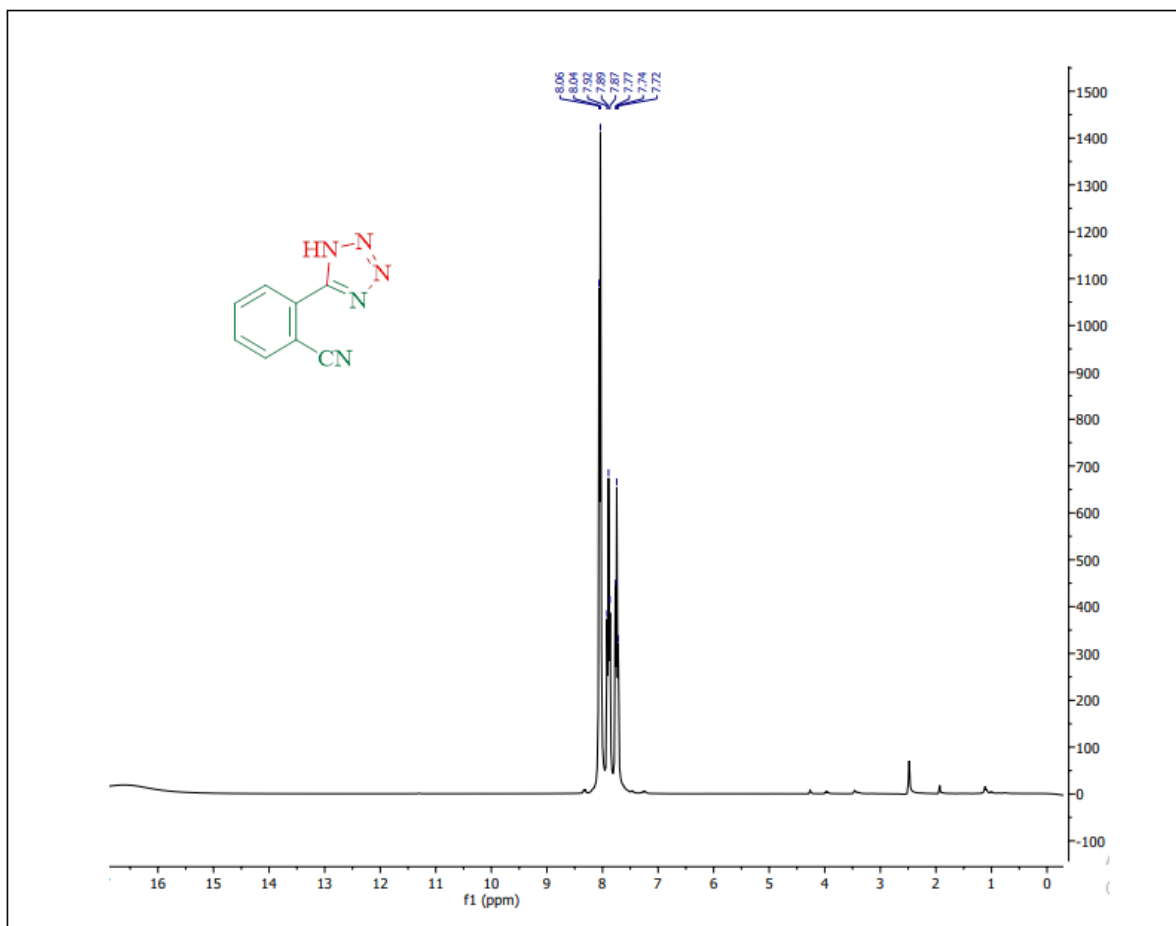

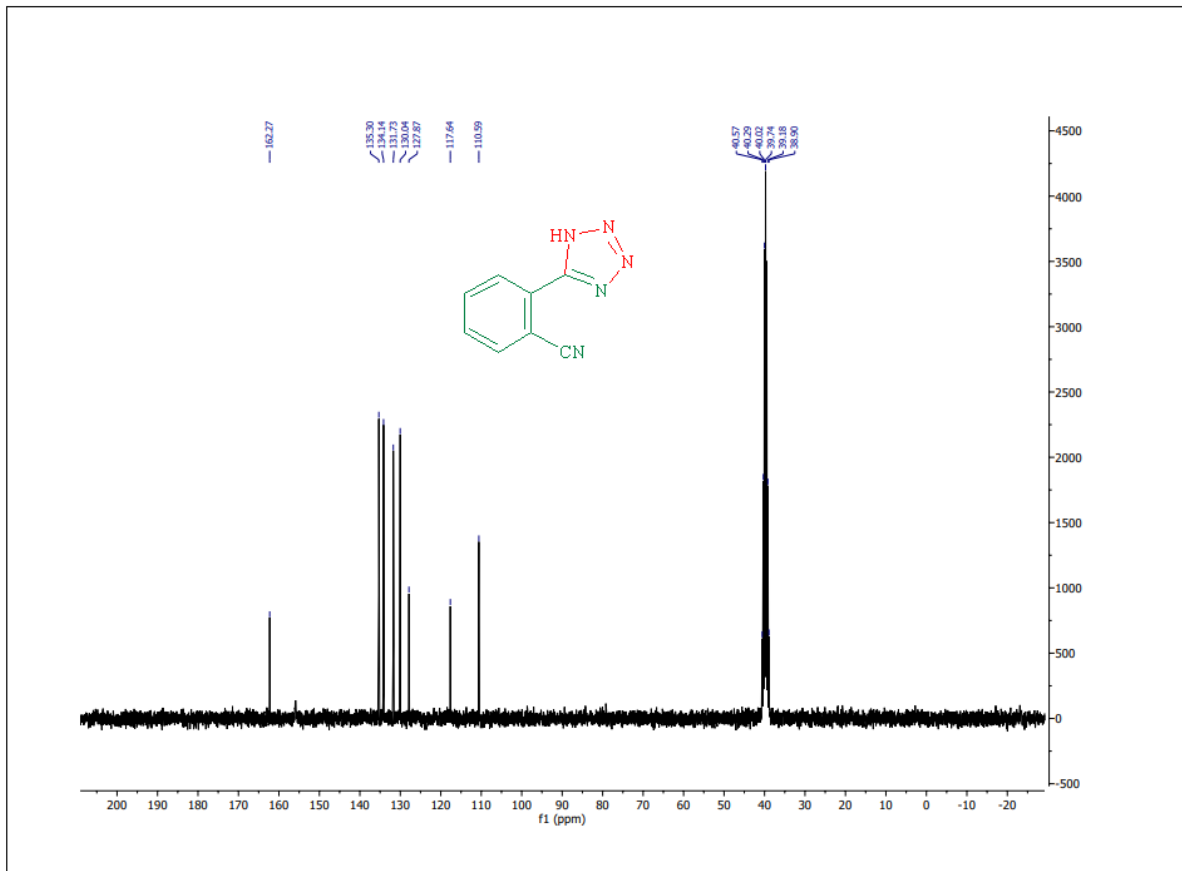



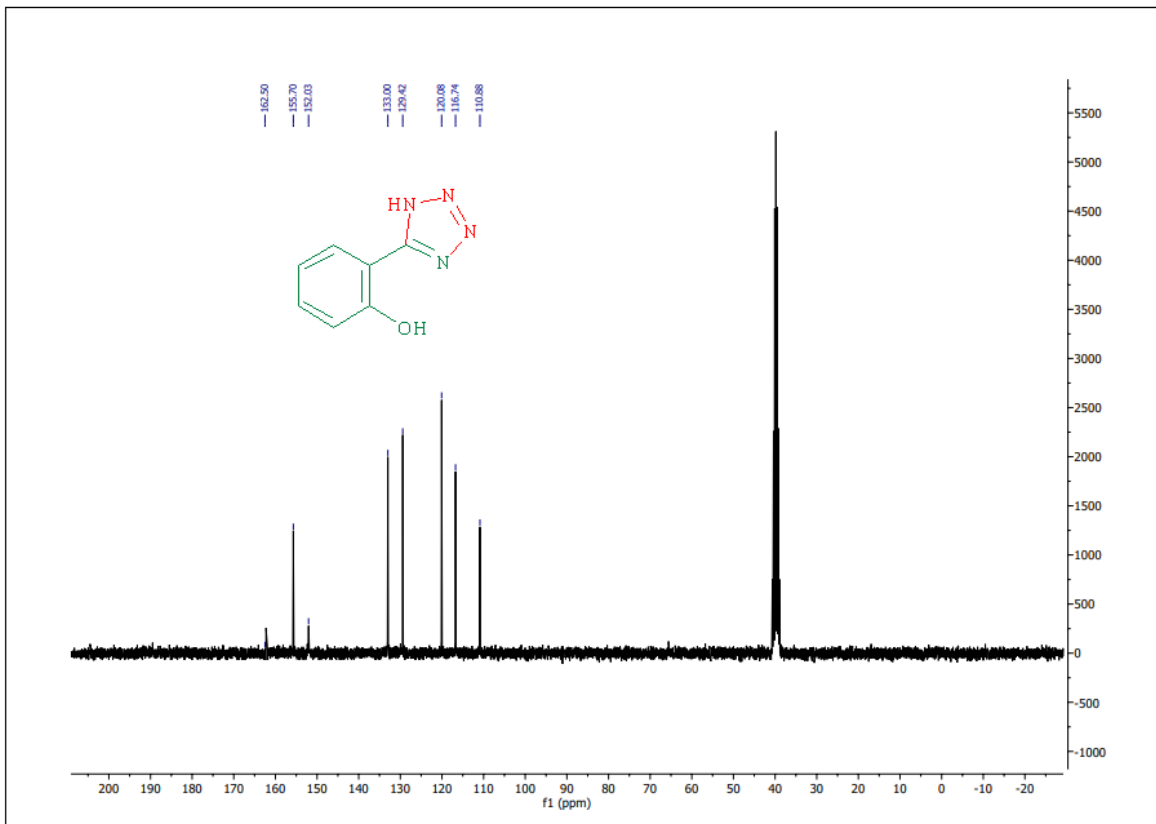

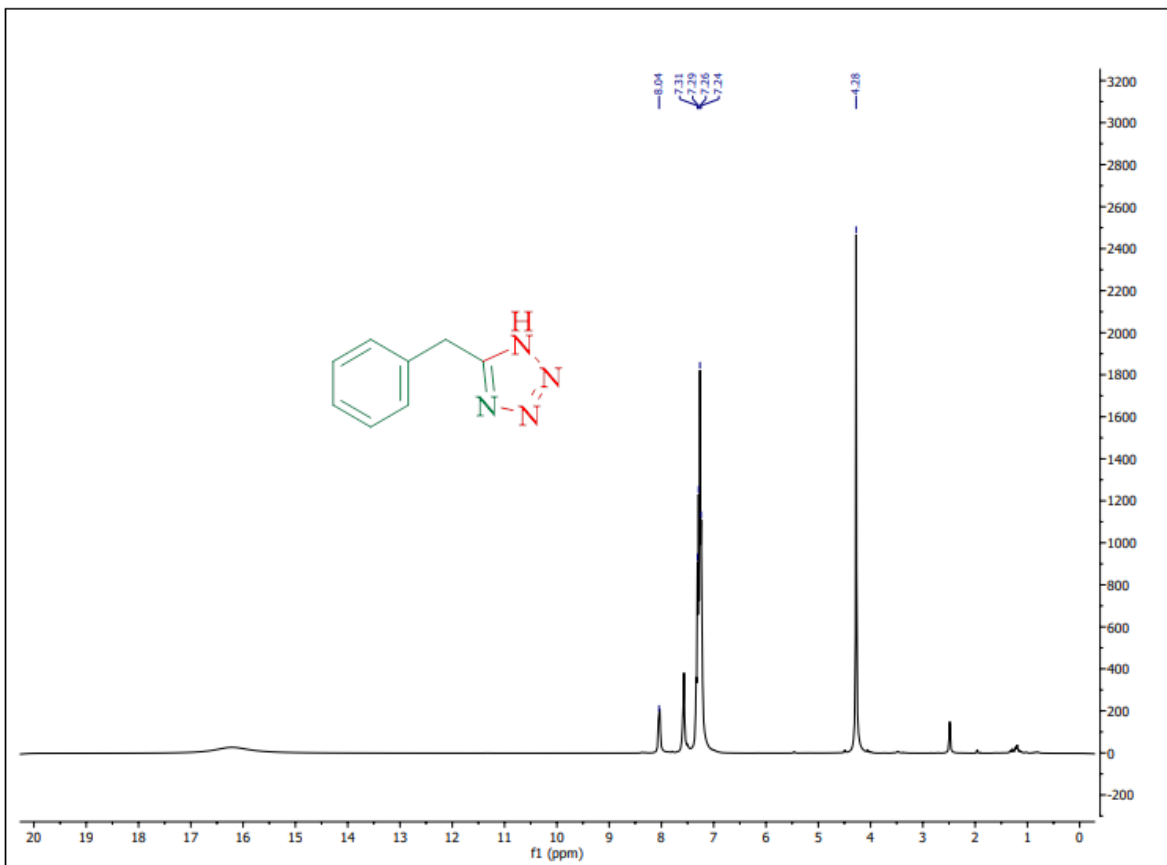

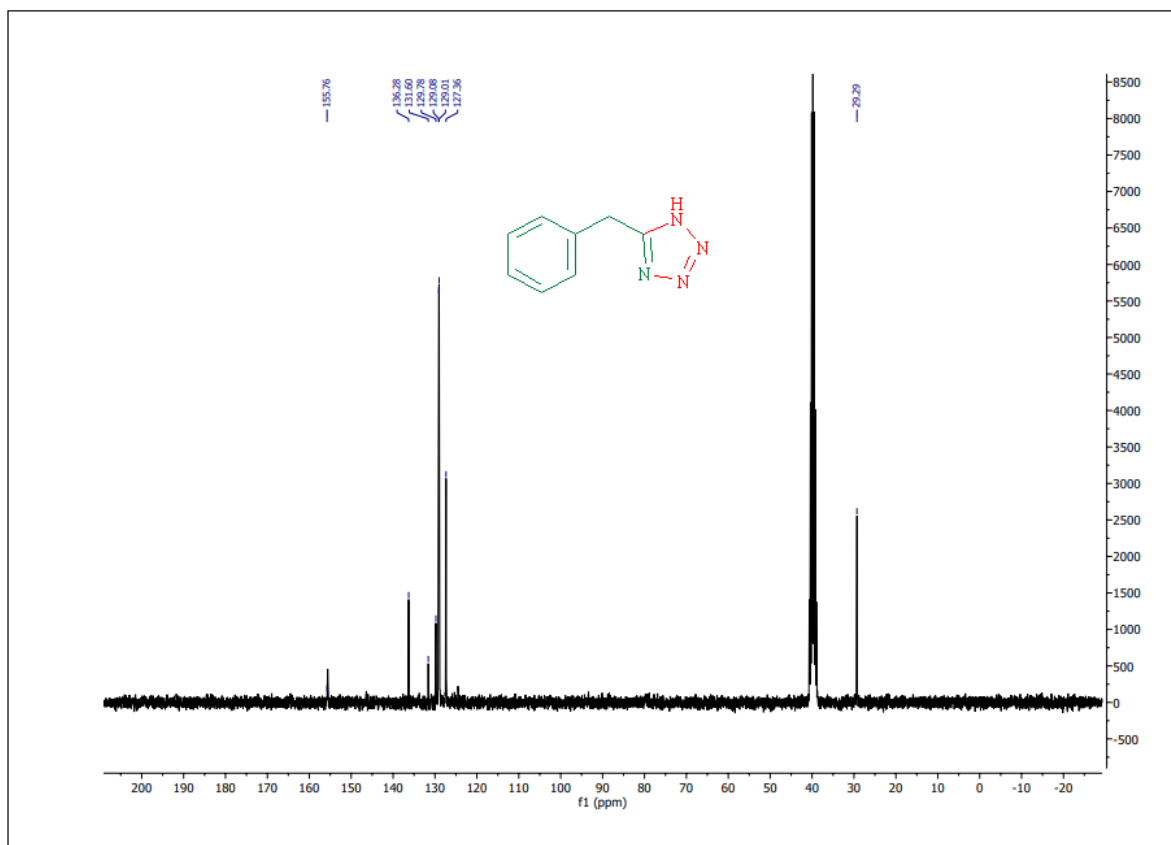

Supplement: d3na00318c1.pdf [file d3na00318c1.pdf]
